# Supplementary material
Source: publisher figshare collection journal article supplement (https://tandf.figshare.com/ndownloader/files/39658271)
Supplement: Supplementary file 1 [file 39658271]

**Appendix C: Data of functional relevance**

|  | 1 | 3 | 5 | 7 | 9 | C1 | C2 | C3 |  |  |  | C | E | mean | result |
| --- | --- | --- | --- | --- | --- | --- | --- | --- | --- | --- | --- | --- | --- | --- | --- |
|  | (0, 0.1, 0.3) | (0.2, 0.3, 0.5) | (0.4, 0.5, 0.7) | (0.6, 0.7, 0.9) | (0.8, 0.9, 1.0) |  |  |  |  |  |  |  |  |  |  |
| b11 | 13 | 2 | 0 | 0 | 0 | 0.4 | 1.9 | 4.900 | 0.027 | 0.127 | 0.326666667 | (0.027,0.127,0.327) | 0.8 | 0.16 | 0.127222222 |
| b12 | 13 | 2 | 0 | 0 | 0 | 0.4 | 1.9 | 4.900 | 0.027 | 0.127 | 0.326666667 | (0.027,0.127,0.327) | 0.8 | 0.16 | 0.127222222 |
| b13 | 13 | 2 | 0 | 0 | 0 | 0.4 | 1.9 | 4.900 | 0.027 | 0.127 | 0.326666667 | (0.027,0.127,0.327) | 0.8 | 0.16 | 0.127222222 |
| b14 | 15 | 0 | 0 | 0 | 0 | 0 | 1.5 | 4.500 | 0.000 | 0.100 | 0.3 | (0,0.1,0.3) | 0.8 | 0.133333333 | 0.105888889 |
| b15 | 14 | 1 | 0 | 0 | 0 | 0.2 | 1.7 | 4.700 | 0.013 | 0.113 | 0.313333333 | (0.013,0.113,0.313) | 0.8 | 0.146666667 | 0.116555556 |
| b16 | 13 | 2 | 0 | 0 | 0 | 0.4 | 1.9 | 4.900 | 0.027 | 0.127 | 0.326666667 | (0.027,0.127,0.327) | 0.8 | 0.16 | 0.127222222 |
| b17 | 10 | 5 | 0 | 0 | 0 | 1 | 2.5 | 5.500 | 0.067 | 0.167 | 0.366666667 | (0.067,0.167,0.367) | 0.8 | 0.2 | 0.159222222 |
| b18 | 12 | 3 | 0 | 0 | 0 | 0.6 | 2.1 | 5.100 | 0.040 | 0.140 | 0.34 | (0.04,0.14,0.34) | 0.8 | 0.173333333 | 0.137888889 |
| b19 | 5 | 6 | 3 | 1 | 0 | 3 | 4.5 | 7.500 | 0.200 | 0.300 | 0.5 | (0.2,0.3,0.5) | 0.8 | 0.333333333 | 0.265888889 |
| b21 | 7 | 5 | 3 | 0 | 0 | 2.2 | 3.7 | 6.700 | 0.147 | 0.247 | 0.446666667 | (0.147,0.247,0.447) | 0.8 | 0.28 | 0.223222222 |
| b22 | 14 | 1 | 0 | 0 | 0 | 0.2 | 1.7 | 4.700 | 0.013 | 0.113 | 0.313333333 | (0.013,0.113,0.313) | 0.8 | 0.146666667 | 0.116555556 |
| b23 | 9 | 6 | 0 | 0 | 0 | 1.2 | 2.7 | 5.700 | 0.080 | 0.180 | 0.38 | (0.08,0.18,0.38) | 0.8 | 0.213333333 | 0.169888889 |
| b24 | 13 | 2 | 0 | 0 | 0 | 0.4 | 1.9 | 4.900 | 0.027 | 0.127 | 0.326666667 | (0.027,0.127,0.327) | 0.8 | 0.16 | 0.127222222 |
| b25 | 14 | 1 | 0 | 0 | 0 | 0.2 | 1.7 | 4.700 | 0.013 | 0.113 | 0.313333333 | (0.013,0.113,0.313) | 0.8 | 0.146666667 | 0.116555556 |
| b26 | 15 | 0 | 0 | 0 | 0 | 0 | 1.5 | 4.500 | 0.000 | 0.100 | 0.3 | (0,0.1,0.3) | 0.8 | 0.133333333 | 0.105888889 |
| b27 | 12 | 3 | 0 | 0 | 0 | 0.6 | 2.1 | 5.100 | 0.040 | 0.140 | 0.34 | (0.04,0.14,0.34) | 0.8 | 0.173333333 | 0.137888889 |
| b28 | 14 | 1 | 0 | 0 | 0 | 0.2 | 1.7 | 4.700 | 0.013 | 0.113 | 0.313333333 | (0.013,0.113,0.313) | 0.8 | 0.146666667 | 0.116555556 |
| b29 | 15 | 0 | 0 | 0 | 0 | 0 | 1.5 | 4.500 | 0.000 | 0.100 | 0.3 | (0,0.1,0.3) | 0.8 | 0.133333333 | 0.105888889 |
| b31 | 0 | 0 | 0 | 6 | 9 | 10.8 | 12.3 | 14.400 | 0.720 | 0.820 | 0.96 | (0.72,0.82,0.96) | 0.84 | 0.833333333 | 0.699612444 |
| b32 | 14 | 1 | 0 | 0 | 0 | 0.2 | 1.7 | 4.700 | 0.013 | 0.113 | 0.313333333 | (0.013,0.113,0.313) | 0.8 | 0.146666667 | 0.116555556 |
| b33 | 12 | 3 | 0 | 0 | 0 | 0.6 | 2.1 | 5.100 | 0.040 | 0.140 | 0.34 | (0.04,0.14,0.34) | 0.8 | 0.173333333 | 0.137888889 |
| b34 | 13 | 2 | 0 | 0 | 0 | 0.4 | 1.9 | 4.900 | 0.027 | 0.127 | 0.326666667 | (0.027,0.127,0.327) | 0.8 | 0.16 | 0.127222222 |
| b35 | 0 | 0 | 5 | 4 | 6 | 9.2 | 10.7 | 13.100 | 0.613 | 0.713 | 0.873333333 | (0.613,0.713,0.873) | 0.826666667 | 0.733333333 | 0.605725333 |
| b36 | 11 | 4 | 0 | 0 | 0 | 0.8 | 2.3 | 5.300 | 0.053 | 0.153 | 0.353333333 | (0.053,0.153,0.353) | 0.8 | 0.186666667 | 0.148555556 |
| b37 | 13 | 2 | 0 | 0 | 0 | 0.4 | 1.9 | 4.900 | 0.027 | 0.127 | 0.326666667 | (0.027,0.127,0.327) | 0.8 | 0.16 | 0.127222222 |
| b38 | 13 | 2 | 0 | 0 | 0 | 0.4 | 1.9 | 4.900 | 0.027 | 0.127 | 0.326666667 | (0.027,0.127,0.327) | 0.8 | 0.16 | 0.127222222 |
| b39 | 6 | 2 | 4 | 3 | 0 | 3.8 | 5.3 | 8.300 | 0.253 | 0.353 | 0.553333333 | (0.253,0.353,0.553) | 0.8 | 0.386666667 | 0.308555556 |
| b41 | 13 | 2 | 0 | 0 | 0 | 0.4 | 1.9 | 4.900 | 0.027 | 0.127 | 0.326666667 | (0.027,0.127,0.327) | 0.8 | 0.16 | 0.127222222 |
| b42 | 12 | 3 | 0 | 0 | 0 | 0.6 | 2.1 | 5.100 | 0.040 | 0.140 | 0.34 | (0.04,0.14,0.34) | 0.8 | 0.173333333 | 0.137888889 |
| b43 | 14 | 1 | 0 | 0 | 0 | 0.2 | 1.7 | 4.700 | 0.013 | 0.113 | 0.313333333 | (0.013,0.113,0.313) | 0.8 | 0.146666667 | 0.116555556 |
| b44 | 15 | 0 | 0 | 0 | 0 | 0 | 1.5 | 4.500 | 0.000 | 0.100 | 0.3 | (0,0.1,0.3) | 0.8 | 0.133333333 | 0.105888889 |
| b45 | 15 | 0 | 0 | 0 | 0 | 0 | 1.5 | 4.500 | 0.000 | 0.100 | 0.3 | (0,0.1,0.3) | 0.8 | 0.133333333 | 0.105888889 |
| b46 | 14 | 1 | 0 | 0 | 0 | 0.2 | 1.7 | 4.700 | 0.013 | 0.113 | 0.313333333 | (0.013,0.113,0.313) | 0.8 | 0.146666667 | 0.116555556 |
| b47 | 12 | 3 | 0 | 0 | 0 | 0.6 | 2.1 | 5.100 | 0.040 | 0.140 | 0.34 | (0.04,0.14,0.34) | 0.8 | 0.173333333 | 0.137888889 |
| b48 | 14 | 1 | 0 | 0 | 0 | 0.2 | 1.7 | 4.700 | 0.013 | 0.113 | 0.313333333 | (0.013,0.113,0.313) | 0.8 | 0.146666667 | 0.116555556 |
| b49 | 15 | 0 | 0 | 0 | 0 | 0 | 1.5 | 4.500 | 0.000 | 0.100 | 0.3 | (0,0.1,0.3) | 0.8 | 0.133333333 | 0.105888889 |
| b51 | 14 | 1 | 0 | 0 | 0 | 0.2 | 1.7 | 4.700 | 0.013 | 0.113 | 0.313333333 | (0.013,0.113,0.313) | 0.8 | 0.146666667 | 0.116555556 |
| b52 | 15 | 0 | 0 | 0 | 0 | 0 | 1.5 | 4.500 | 0.000 | 0.100 | 0.3 | (0,0.1,0.3) | 0.8 | 0.133333333 | 0.105888889 |
| b53 | 14 | 1 | 0 | 0 | 0 | 0.2 | 1.7 | 4.700 | 0.013 | 0.113 | 0.313333333 | (0.013,0.113,0.313) | 0.8 | 0.146666667 | 0.116555556 |
| b54 | 12 | 3 | 0 | 0 | 0 | 0.6 | 2.1 | 5.100 | 0.040 | 0.140 | 0.34 | (0.04,0.14,0.34) | 0.8 | 0.173333333 | 0.137888889 |
| b55 | 14 | 1 | 0 | 0 | 0 | 0.2 | 1.7 | 4.700 | 0.013 | 0.113 | 0.313333333 | (0.013,0.113,0.313) | 0.8 | 0.146666667 | 0.116555556 |
| b56 | 0 | 4 | 8 | 3 | 0 | 5.8 | 7.3 | 10.300 | 0.387 | 0.487 | 0.686666667 | (0.387,0.487,0.687) | 0.8 | 0.52 | 0.415222222 |
| b57 | 13 | 2 | 0 | 0 | 0 | 0.4 | 1.9 | 4.900 | 0.027 | 0.127 | 0.326666667 | (0.027,0.127,0.327) | 0.8 | 0.16 | 0.127222222 |
| b58 | 15 | 0 | 0 | 0 | 0 | 0 | 1.5 | 4.500 | 0.000 | 0.100 | 0.3 | (0,0.1,0.3) | 0.8 | 0.133333333 | 0.105888889 |
| b59 | 15 | 0 | 0 | 0 | 0 | 0 | 1.5 | 4.500 | 0.000 | 0.100 | 0.3 | (0,0.1,0.3) | 0.8 | 0.133333333 | 0.105888889 |
| b61 | 12 | 3 | 0 | 0 | 0 | 0.6 | 2.1 | 5.100 | 0.040 | 0.140 | 0.34 | (0.04,0.14,0.34) | 0.8 | 0.173333333 | 0.137888889 |
| b62 | 0 | 0 | 6 | 8 | 1 | 8 | 9.5 | 12.400 | 0.533 | 0.633 | 0.826666667 | (0.533,0.633,0.827) | 0.804444444 | 0.664444444 | 0.533783879 |
| b63 | 0 | 0 | 0 | 8 | 7 | 10.4 | 11.9 | 14.200 | 0.693 | 0.793 | 0.946666667 | (0.693,0.793,0.947) | 0.831111111 | 0.811111111 | 0.673665163 |
| b64 | 0 | 0 | 8 | 7 | 0 | 7.4 | 8.9 | 11.900 | 0.493 | 0.593 | 0.793333333 | (0.493,0.593,0.793) | 0.8 | 0.626666667 | 0.500555556 |
| b65 | 0 | 0 | 0 | 9 | 6 | 10.2 | 11.7 | 14.100 | 0.680 | 0.780 | 0.94 | (0.68,0.78,0.94) | 0.826666667 | 0.8 | 0.660836444 |
| b66 | 0 | 0 | 0 | 1 | 14 | 11.8 | 13.3 | 14.900 | 0.787 | 0.887 | 0.993333333 | (0.787,0.887,0.993) | 0.862222222 | 0.888888889 | 0.766174475 |
| b67 | 0 | 0 | 2 | 10 | 3 | 9.2 | 10.7 | 13.400 | 0.613 | 0.713 | 0.893333333 | (0.613,0.713,0.893) | 0.813333333 | 0.74 | 0.601240296 |
| b68 | 0 | 0 | 6 | 5 | 4 | 8.6 | 10.1 | 12.700 | 0.573 | 0.673 | 0.846666667 | (0.573,0.673,0.847) | 0.817777778 | 0.697777778 | 0.570046299 |
| b69 | 0 | 0 | 3 | 5 | 7 | 9.8 | 11.3 | 13.600 | 0.653 | 0.753 | 0.906666667 | (0.653,0.753,0.907) | 0.831111111 | 0.771111111 | 0.640420719 |
| b71 | 0 | 0 | 0 | 7 | 8 | 10.6 | 12.1 | 14.300 | 0.707 | 0.807 | 0.953333333 | (0.707,0.807,0.953) | 0.835555556 | 0.822222222 | 0.686590475 |
| b72 | 0 | 7 | 8 | 0 | 0 | 4.6 | 6.1 | 9.100 | 0.307 | 0.407 | 0.606666667 | (0.307,0.407,0.607) | 0.8 | 0.44 | 0.351222222 |
| b73 | 2 | 5 | 3 | 5 | 0 | 5.2 | 6.7 | 9.700 | 0.347 | 0.447 | 0.646666667 | (0.347,0.447,0.647) | 0.8 | 0.48 | 0.383222222 |
| b74 | 2 | 6 | 7 | 0 | 0 | 4 | 5.5 | 8.500 | 0.267 | 0.367 | 0.566666667 | (0.267,0.367,0.567) | 0.8 | 0.4 | 0.319222222 |
| b75 | 0 | 0 | 1 | 2 | 12 | 11.2 | 12.7 | 14.500 | 0.747 | 0.847 | 0.966666667 | (0.747,0.847,0.967) | 0.853333333 | 0.853333333 | 0.727881185 |
| b76 | 0 | 3 | 4 | 3 | 5 | 8 | 9.5 | 12.000 | 0.533 | 0.633 | 0.8 | (0.533,0.633,0.8) | 0.822222222 | 0.655555556 | 0.538474623 |
| b77 | 0 | 0 | 5 | 9 | 1 | 8.2 | 9.7 | 12.600 | 0.547 | 0.647 | 0.84 | (0.547,0.647,0.84) | 0.804444444 | 0.677777778 | 0.544509805 |
| b78 | 0 | 8 | 6 | 1 | 0 | 4.6 | 6.1 | 9.100 | 0.307 | 0.407 | 0.606666667 | (0.307,0.407,0.607) | 0.8 | 0.44 | 0.351222222 |
| b79 | 0 | 0 | 4 | 7 | 4 | 9 | 10.5 | 13.100 | 0.600 | 0.700 | 0.873333333 | (0.6,0.7,0.873) | 0.817777778 | 0.724444444 | 0.591853706 |
| b81 | 0 | 1 | 2 | 7 | 5 | 9.2 | 10.7 | 13.200 | 0.613 | 0.713 | 0.88 | (0.613,0.713,0.88) | 0.822222222 | 0.735555556 | 0.604252401 |
| b82 | 0 | 0 | 1 | 9 | 5 | 9.8 | 11.3 | 13.800 | 0.653 | 0.753 | 0.92 | (0.653,0.753,0.92) | 0.822222222 | 0.775555556 | 0.637141289 |
| b83 | 5 | 6 | 4 | 0 | 0 | 2.8 | 4.3 | 7.300 | 0.187 | 0.287 | 0.486666667 | (0.187,0.287,0.487) | 0.8 | 0.32 | 0.255222222 |
| b84 | 7 | 4 | 4 | 0 | 0 | 2.4 | 3.9 | 6.900 | 0.160 | 0.260 | 0.46 | (0.16,0.26,0.46) | 0.8 | 0.293333333 | 0.233888889 |
| b85 | 0 | 0 | 2 | 5 | 8 | 10.2 | 11.7 | 13.900 | 0.680 | 0.780 | 0.926666667 | (0.68,0.78,0.927) | 0.835555556 | 0.795555556 | 0.664308993 |
| b86 | 6 | 5 | 4 | 0 | 0 | 2.6 | 4.1 | 7.100 | 0.173 | 0.273 | 0.473333333 | (0.173,0.273,0.473) | 0.8 | 0.306666667 | 0.244555556 |
| b87 | 0 | 9 | 6 | 0 | 0 | 4.2 | 5.7 | 8.700 | 0.280 | 0.380 | 0.58 | (0.28,0.38,0.58) | 0.8 | 0.413333333 | 0.329888889 |
| b88 | 0 | 1 | 3 | 7 | 4 | 8.8 | 10.3 | 12.900 | 0.587 | 0.687 | 0.86 | (0.587,0.687,0.86) | 0.817777778 | 0.711111111 | 0.580950003 |
| b89 | 0 | 0 | 4 | 5 | 6 | 9.4 | 10.9 | 13.300 | 0.627 | 0.727 | 0.886666667 | (0.627,0.727,0.887) | 0.826666667 | 0.746666667 | 0.616747556 |
| b91 | 0 | 2 | 8 | 5 | 0 | 6.6 | 8.1 | 11.100 | 0.440 | 0.540 | 0.74 | (0.44,0.54,0.74) | 0.8 | 0.573333333 | 0.457888889 |
| b92 | 0 | 0 | 0 | 1 | 14 | 11.8 | 13.3 | 14.900 | 0.787 | 0.887 | 0.993333333 | (0.787,0.887,0.993) | 0.862222222 | 0.888888889 | 0.766174475 |
| b93 | 7 | 6 | 2 | 0 | 0 | 2 | 3.5 | 6.500 | 0.133 | 0.233 | 0.433333333 | (0.133,0.233,0.433) | 0.8 | 0.266666667 | 0.212555556 |
| b94 | 9 | 5 | 1 | 0 | 0 | 1.4 | 2.9 | 5.900 | 0.093 | 0.193 | 0.393333333 | (0.093,0.193,0.393) | 0.8 | 0.226666667 | 0.180555556 |
| b95 | 0 | 0 | 0 | 4 | 11 | 11.2 | 12.7 | 14.600 | 0.747 | 0.847 | 0.973333333 | (0.747,0.847,0.973) | 0.848888889 | 0.855555556 | 0.725946623 |
| b96 | 6 | 4 | 4 | 1 | 0 | 3 | 4.5 | 7.500 | 0.200 | 0.300 | 0.5 | (0.2,0.3,0.5) | 0.8 | 0.333333333 | 0.265888889 |
| b97 | 8 | 7 | 0 | 0 | 0 | 1.4 | 2.9 | 5.900 | 0.093 | 0.193 | 0.393333333 | (0.093,0.193,0.393) | 0.8 | 0.226666667 | 0.180555556 |
| b98 | 2 | 5 | 3 | 5 | 0 | 5.2 | 6.7 | 9.700 | 0.347 | 0.447 | 0.646666667 | (0.347,0.447,0.647) | 0.8 | 0.48 | 0.383222222 |
| b99 | 0 | 1 | 7 | 6 | 1 | 7.4 | 8.9 | 11.800 | 0.493 | 0.593 | 0.786666667 | (0.493,0.593,0.787) | 0.804444444 | 0.624444444 | 0.501606102 |
| b101 | 8 | 7 | 0 | 0 | 0 | 1.4 | 2.9 | 5.900 | 0.093 | 0.193 | 0.393333333 | (0.093,0.193,0.393) | 0.8 | 0.226666667 | 0.180555556 |
| b102 | 15 | 0 | 0 | 0 | 0 | 0 | 1.5 | 4.500 | 0.000 | 0.100 | 0.3 | (0,0.1,0.3) | 0.8 | 0.133333333 | 0.105888889 |
| b103 | 0 | 6 | 7 | 1 | 1 | 5.4 | 6.9 | 9.800 | 0.360 | 0.460 | 0.653333333 | (0.36,0.46,0.653) | 0.804444444 | 0.491111111 | 0.394346842 |
| b104 | 6 | 9 | 0 | 0 | 0 | 1.8 | 3.3 | 6.300 | 0.120 | 0.220 | 0.42 | (0.12,0.22,0.42) | 0.8 | 0.253333333 | 0.201888889 |
| b105 | 8 | 3 | 3 | 1 | 0 | 2.4 | 3.9 | 6.900 | 0.160 | 0.260 | 0.46 | (0.16,0.26,0.46) | 0.8 | 0.293333333 | 0.233888889 |
| b106 | 0 | 0 | 4 | 7 | 4 | 9 | 10.5 | 13.100 | 0.600 | 0.700 | 0.873333333 | (0.6,0.7,0.873) | 0.817777778 | 0.724444444 | 0.591853706 |
| b107 | 0 | 6 | 7 | 2 | 0 | 5.2 | 6.7 | 9.700 | 0.347 | 0.447 | 0.646666667 | (0.347,0.447,0.647) | 0.8 | 0.48 | 0.383222222 |
| b108 | 0 | 0 | 9 | 6 | 0 | 7.2 | 8.7 | 11.700 | 0.480 | 0.580 | 0.78 | (0.48,0.58,0.78) | 0.8 | 0.613333333 | 0.489888889 |
| b109 | 0 | 0 | 0 | 3 | 12 | 11.4 | 12.9 | 14.700 | 0.760 | 0.860 | 0.98 | (0.76,0.86,0.98) | 0.853333333 | 0.866666667 | 0.739258963 |
| b111 | 0 | 0 | 2 | 8 | 5 | 9.6 | 11.1 | 13.600 | 0.640 | 0.740 | 0.906666667 | (0.64,0.74,0.907) | 0.822222222 | 0.762222222 | 0.626178326 |
| b112 | 11 | 4 | 0 | 0 | 0 | 0.8 | 2.3 | 5.300 | 0.053 | 0.153 | 0.353333333 | (0.053,0.153,0.353) | 0.8 | 0.186666667 | 0.148555556 |
| b113 | 0 | 0 | 2 | 9 | 4 | 9.4 | 10.9 | 13.500 | 0.627 | 0.727 | 0.9 | (0.627,0.727,0.9) | 0.817777778 | 0.751111111 | 0.613661114 |
| b114 | 9 | 6 | 0 | 0 | 0 | 1.2 | 2.7 | 5.700 | 0.080 | 0.180 | 0.38 | (0.08,0.18,0.38) | 0.8 | 0.213333333 | 0.169888889 |
| b115 | 0 | 0 | 3 | 7 | 5 | 9.4 | 10.9 | 13.400 | 0.627 | 0.727 | 0.893333333 | (0.627,0.727,0.893) | 0.822222222 | 0.748888889 | 0.615215364 |
| b116 | 13 | 2 | 0 | 0 | 0 | 0.4 | 1.9 | 4.900 | 0.027 | 0.127 | 0.326666667 | (0.027,0.127,0.327) | 0.8 | 0.16 | 0.127222222 |
| b117 | 11 | 4 | 0 | 0 | 0 | 0.8 | 2.3 | 5.300 | 0.053 | 0.153 | 0.353333333 | (0.053,0.153,0.353) | 0.8 | 0.186666667 | 0.148555556 |
| b118 | 9 | 6 | 0 | 0 | 0 | 1.2 | 2.7 | 5.700 | 0.080 | 0.180 | 0.38 | (0.08,0.18,0.38) | 0.8 | 0.213333333 | 0.169888889 |
| b119 | 4 | 6 | 5 | 0 | 0 | 3.2 | 4.7 | 7.700 | 0.213 | 0.313 | 0.513333333 | (0.213,0.313,0.513) | 0.8 | 0.346666667 | 0.276555556 |
| b121 | 0 | 5 | 5 | 5 | 0 | 6 | 7.5 | 10.500 | 0.400 | 0.500 | 0.7 | (0.4,0.5,0.7) | 0.8 | 0.533333333 | 0.425888889 |
| b122 | 0 | 0 | 0 | 4 | 11 | 11.2 | 12.7 | 14.600 | 0.747 | 0.847 | 0.973333333 | (0.747,0.847,0.973) | 0.848888889 | 0.855555556 | 0.725946623 |
| b123 | 10 | 5 | 0 | 0 | 0 | 1 | 2.5 | 5.500 | 0.067 | 0.167 | 0.366666667 | (0.067,0.167,0.367) | 0.8 | 0.2 | 0.159222222 |
| b124 | 11 | 4 | 0 | 0 | 0 | 0.8 | 2.3 | 5.300 | 0.053 | 0.153 | 0.353333333 | (0.053,0.153,0.353) | 0.8 | 0.186666667 | 0.148555556 |
| b125 | 0 | 0 | 1 | 2 | 12 | 11.2 | 12.7 | 14.500 | 0.747 | 0.847 | 0.966666667 | (0.747,0.847,0.967) | 0.853333333 | 0.853333333 | 0.727881185 |
| b126 | 11 | 4 | 0 | 0 | 0 | 0.8 | 2.3 | 5.300 | 0.053 | 0.153 | 0.353333333 | (0.053,0.153,0.353) | 0.8 | 0.186666667 | 0.148555556 |
| b127 | 9 | 5 | 1 | 0 | 0 | 1.4 | 2.9 | 5.900 | 0.093 | 0.193 | 0.393333333 | (0.093,0.193,0.393) | 0.8 | 0.226666667 | 0.180555556 |
| b128 | 8 | 7 | 0 | 0 | 0 | 1.4 | 2.9 | 5.900 | 0.093 | 0.193 | 0.393333333 | (0.093,0.193,0.393) | 0.8 | 0.226666667 | 0.180555556 |
| b129 | 5 | 3 | 3 | 4 | 0 | 4.2 | 5.7 | 8.700 | 0.280 | 0.380 | 0.58 | (0.28,0.38,0.58) | 0.8 | 0.413333333 | 0.329888889 |
| b131 | 0 | 0 | 7 | 8 | 0 | 7.6 | 9.1 | 12.100 | 0.507 | 0.607 | 0.806666667 | (0.507,0.607,0.807) | 0.8 | 0.64 | 0.511222222 |
| b132 | 10 | 5 | 0 | 0 | 0 | 1 | 2.5 | 5.500 | 0.067 | 0.167 | 0.366666667 | (0.067,0.167,0.367) | 0.8 | 0.2 | 0.159222222 |
| b133 | 6 | 9 | 0 | 0 | 0 | 1.8 | 3.3 | 6.300 | 0.120 | 0.220 | 0.42 | (0.12,0.22,0.42) | 0.8 | 0.253333333 | 0.201888889 |
| b134 | 6 | 5 | 4 | 0 | 0 | 2.6 | 4.1 | 7.100 | 0.173 | 0.273 | 0.473333333 | (0.173,0.273,0.473) | 0.8 | 0.306666667 | 0.244555556 |
| b135 | 0 | 0 | 0 | 7 | 8 | 10.6 | 12.1 | 14.300 | 0.707 | 0.807 | 0.953333333 | (0.707,0.807,0.953) | 0.835555556 | 0.822222222 | 0.686590475 |
| b136 | 0 | 0 | 0 | 7 | 8 | 10.6 | 12.1 | 14.300 | 0.707 | 0.807 | 0.953333333 | (0.707,0.807,0.953) | 0.835555556 | 0.822222222 | 0.686590475 |
| b137 | 1 | 4 | 8 | 2 | 0 | 5.2 | 6.7 | 9.700 | 0.347 | 0.447 | 0.646666667 | (0.347,0.447,0.647) | 0.8 | 0.48 | 0.383222222 |
| b138 | 10 | 5 | 0 | 0 | 0 | 1 | 2.5 | 5.500 | 0.067 | 0.167 | 0.366666667 | (0.067,0.167,0.367) | 0.8 | 0.2 | 0.159222222 |
| b139 | 0 | 0 | 0 | 6 | 9 | 10.8 | 12.3 | 14.400 | 0.720 | 0.820 | 0.96 | (0.72,0.82,0.96) | 0.84 | 0.833333333 | 0.699612444 |
